# Supplementary material for: REV-ERBα and REV-ERBβ function as key factors regulating Mammalian Circadian Output
Source: Sci Rep. 2019 Jul 15;9:10171. doi: 10.1038/s41598-019-46656-0 (PMC6629614; doi:10.1038/s41598-019-46656-0)
Supplement: Supplementary file 1 — Supplementary Figures [file 41598_2019_46656_MOESM1_ESM.pdf]

**Supplementary information:**

**REV-ERB $\alpha$  and REV-ERB $\beta$  function as key factors regulating Mammalian Circadian Output**

Ryosuke Ikeda<sup>1,2</sup>, Yoshiki Tsuchiya<sup>1,\*</sup>, Nobuya Koike<sup>1</sup>, Yasuhiro Umemura<sup>1</sup>, Hitoshi Inokawa<sup>1</sup>, Ryutaro Ono<sup>1</sup>, Maho Inoue<sup>1</sup>, Yuh Sasawaki<sup>1</sup>, Tess Grieten<sup>1</sup>, Naoki Okubo<sup>2</sup>, Kazuya Ikoma<sup>2</sup>, Hiroyoshi Fujiwara<sup>2</sup>, Toshikazu Kubo<sup>2</sup>, & Kazuhiro Yagita<sup>1,\*</sup>

<sup>1</sup>Department of Physiology and Systems Bioscience, Kyoto Prefectural University of Medicine, Kawaramachi-Hirokoji, Kamigyo-ku, Kyoto, 602-8566, Japan.

<sup>2</sup>Department of Orthopaedics, Kyoto Prefectural University of Medicine, Kawaramachi-Hirokoji, Kamigyo-ku, Kyoto, 602-8566, Japan.

Rev-erb $\alpha$

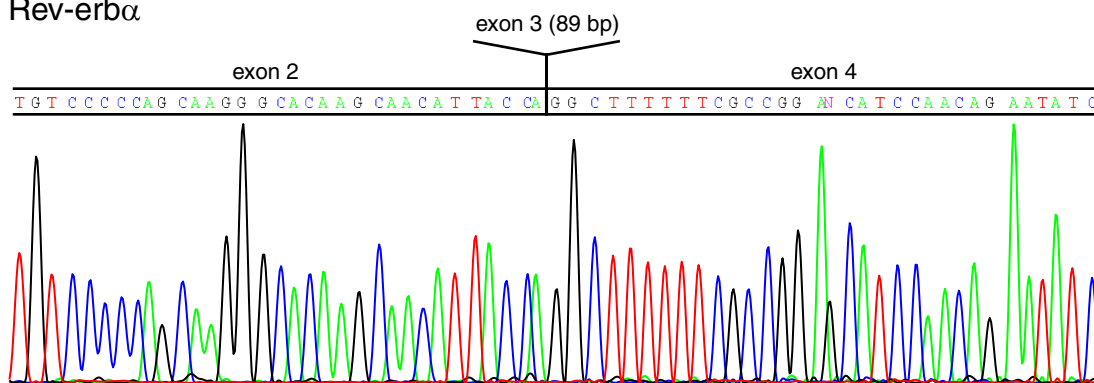

Rev-erb $\beta$

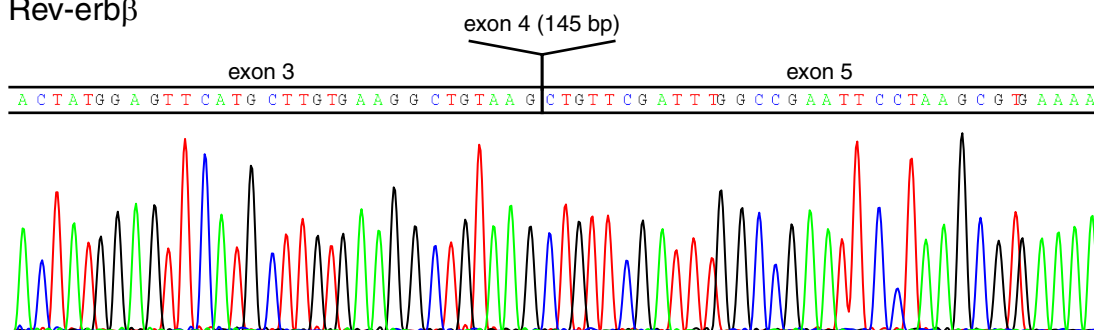

**Supplementary Fig. S1** Sequence of mRNA demonstrates a deletion of the targeted exon. cDNA was synthesized from total RNA extracted from WT and KO cells and CRISPR-targeted regions were amplified by PCR and sequenced.

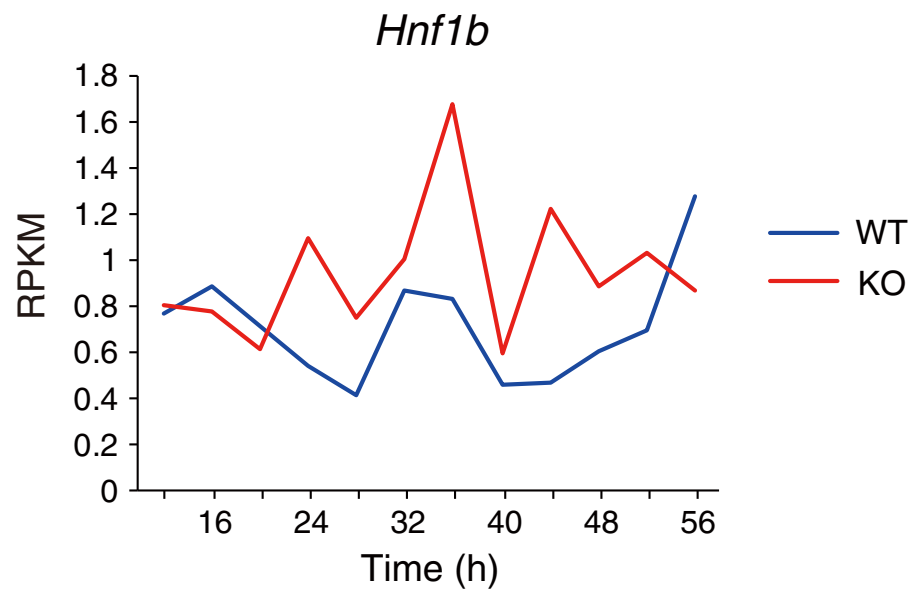

**Supplementary Fig. S2** Expression rhythms of *Hnf1b*. mRNA expression levels of *Hnf1b* in WT and KO cells are plotted with blue and red lines, respectively. *Hnf1b* is cycling in WT but not in KO.
